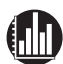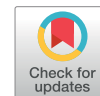

# Diabetic Ketoacidosis and Mortality in People With Type 1 Diabetes and Eating Disorders

Diabetes Care 2021;44:1783–1787 | <https://doi.org/10.2337/dc21-0517>

Nicole K. Gibbings,<sup>1</sup> Paul A. Kurdyak,<sup>2–4</sup>  
Patricia A. Colton,<sup>2,5</sup> and  
Baiju R. Shah<sup>1,4,6</sup>

## OBJECTIVE

To determine the risk of diabetic ketoacidosis (DKA) and all-cause mortality among adolescents and young adults with type 1 diabetes with and without an eating disorder.

## RESEARCH DESIGN AND METHODS

With use of population-level health care administrative data covering the entire population of Ontario, Canada, all people with type 1 diabetes aged 10–39 years as of January 2014 were identified. Individuals with a history of eating disorders were age- and sex-matched 10:1 with individuals without eating disorders. All individuals were followed for 6 years for hospitalization/emergency department visits for DKA and for all-cause mortality.

## RESULTS

We studied 168 people with eating disorders and 1,680 age- and sex-matched people without eating disorders. Among adolescents and young adults with type 1 diabetes, 168 (0.8%) had a history of eating disorders. The crude incidence of DKA was 112.5 per 1,000 patient-years in people with eating disorders vs. 30.8 in people without eating disorders. After adjustment for baseline differences, the subdistribution hazard ratio for comparison of people with and without eating disorders was 3.30 (95% CI 2.58–4.23;  $P < 0.0001$ ). All-cause mortality was 16.0 per 1,000 person-years for people with eating disorders vs. 2.5 for people without eating disorders. The adjusted hazard ratio was 5.80 (95% CI 3.04–11.08;  $P < 0.0001$ ).

## CONCLUSIONS

Adolescents and young adults with type 1 diabetes and eating disorders have more than triple the risk of DKA and nearly sixfold increased risk of death compared with their peers without eating disorders.

Eating disorders are complex mental health conditions characterized by abnormal eating behaviors and disrupted body image. They include anorexia nervosa, bulimia nervosa, binge eating disorder, and other specified feeding and eating disorders (1). Eating disorders are more common in adolescents and young adults with type 1 diabetes than in peers without diabetes (2–4). This association is likely multifactorial, but a focus on meal planning as part of diabetes management, along with continuous attention to numeric parameters (carbohydrate counting, glucose monitoring, and weight management), may contribute to this risk (5). In addition,

<sup>1</sup>Department of Medicine, University of Toronto, Toronto, Ontario, Canada

<sup>2</sup>Department of Psychiatry, University of Toronto, Toronto, Ontario, Canada

<sup>3</sup>Centre for Addiction and Mental Health, Toronto, Ontario, Canada

<sup>4</sup>ICES, Toronto, Ontario, Canada

<sup>5</sup>Department of Psychiatry, University Health Network, Toronto, Ontario, Canada

<sup>6</sup>Division of Endocrinology, Sunnybrook Health Sciences Centre, Toronto, Ontario, Canada

Corresponding author: Baiju R. Shah, baiju.shah@ices.on.ca

Received 5 March 2021 and accepted 13 May 2021

This article contains supplementary material online at <https://doi.org/10.2337/figshare.14596896>.

© 2021 by the American Diabetes Association. Readers may use this article as long as the work is properly cited, the use is educational and not for profit, and the work is not altered. More information is available at <https://www.diabetesjournals.org/content/license>.

people with type 1 diabetes may engage in insulin underdosing and omission, a dangerous behavior often used to promote weight loss or compensate for overeating. This behavior is strongly associated with risk of engaging in other disordered eating behavior and increases the likelihood of adverse medical events (6). Established risk factors for disordered eating behavior in people with type 1 diabetes include age, female sex, weight dissatisfaction, and BMI (7–11).

Having both an eating disorder and type 1 diabetes is associated with poorer glycemic control, as represented by higher hemoglobin A<sub>1c</sub> (2,3,8,12–14). Eating disorders have also been shown to contribute to worse clinical diabetes outcomes including retinopathy, nephropathy, neuropathy, severe hypoglycemia, and diabetic ketoacidosis (DKA) (12–17). Rates of hospitalization and length of hospital stay have been found to be higher in patients with type 1 diabetes with an eating disorder than in those without (13). In addition, individuals with type 1 diabetes are more likely than those without diabetes to drop out of eating disorder treatment or to have a poor treatment response (18). Increased mortality, although expected based on increased rates and severity of diabetes complications, has not been widely reported, presumably because mortality studies require large, population-based sample sizes and a long outcome observation period (19). The objective of this study was to examine the association of eating disorders with DKA and all-cause mortality among adolescents and young adults with type 1 diabetes.

## RESEARCH DESIGN AND METHODS

### Study Design and Data Sources

A population-based cohort study was conducted with use of real-world data for Ontario, the most populous province of Canada. Under the single-payer universal health care system, these databases cover all health care delivery to all residents of Ontario, with no loss to follow-up or missing data. The databases used included demographic data for all residents, records from all admissions to acute care and mental health hospitals, records of all emergency department visits, and all service claims from physicians for inpatient or ambulatory visits or procedures. These data sets were linked with use of unique

encoded identifiers and analyzed at ICES (formerly the Institute for Clinical Evaluative Sciences).

### Study Population

The study population included adolescents and young adults aged 10–39 years on 1 January 2014 from the Ontario Diabetes Database, a population-based disease registry derived using these health care administrative data, which has been validated in both adults and children (20,21). We selected those with type 1 diabetes using an algorithm validated to have specificity of 99.5% and positive predictive value of 79.4% (22). We selected this age range both because of improved detection of type 1 diabetes using our algorithm and because eating disorders are more prevalent compared with older adults.

The cohort was divided into two groups based on diagnosis of an eating disorder (anorexia nervosa, bulimia nervosa, or eating disorder not otherwise specified) prior to the index date. Diagnosis of an eating disorder was defined by an acute care or psychiatric hospitalization or an emergency department visit coded with an eating disorder as the primary or a secondary diagnosis (23). These were identified with ICD-9 codes 307.1, 307.50, and 307.51 and ICD-10 codes F50.0, F50.1, F50.2, F50.3, F50.8, and F50.9.

### Outcomes

Two primary outcomes were ascertained between 1 January 2014 and 1 January 2020: all-cause mortality and DKA, defined as any emergency department visit or hospitalization with an ICD-10 revision code of E10.1.

### Statistical Analysis

Baseline characteristics as of index date included age, sex, income (based on median household income from census data at the level of the census dissemination area and then divided into province-wide quintiles), rurality, and diabetes duration. Each person with an eating disorder was matched to 10 without on age (within 1 year) and sex. Remaining baseline characteristics were compared between patients with a diagnosed eating disorder and those without an eating disorder using standardized differences, which describe differences between group means relative

to the pooled SD; differences >10% reflect potentially meaningful imbalance (24,25). The crude incidence of each outcome was determined for people with and without eating disorders. To determine the independent effect of eating disorders, we used Cox proportional hazards regression for all-cause mortality and a Fine-Gray model for DKA, where mortality was treated as a competing risk. Models were stratified on matched sets. The DKA model was adjusted for income, rurality, and diabetes duration. For avoidance of overfitting with a low number of events, the mortality model was adjusted for diabetes duration only. Sex-specific models were also examined. We explored whether income or rurality were modifiers of the effect of an eating disorder on DKA by repeating the original model with additional interaction terms.

For comparison purposes, we repeated the mortality analysis among people who did not have type 1 diabetes. Finally, we conducted a sensitivity analysis that restricted the look-back period for prior hospitalization or emergency department visit coded with an eating disorder diagnosis to 5 years.

The use of data in this study was authorized under section 45 of Ontario's Personal Health Information Protection Act, which does not require review by a research ethics board.

## RESULTS

There were 20,035 adolescents and young adults with type 1 diabetes who were included in the study. Of those, 168 (0.8%) had a diagnosis of an eating disorder. The baseline characteristics of the overall population are shown in Supplementary Table 1. Those with eating disorders were overwhelmingly female. Patients with eating disorders were older and had a longer duration since diabetes diagnosis than those with no eating disorder. After matching on age and sex, there remained a meaningful imbalance (standardized difference >10%) for rural residency and diabetes duration between 5 and 10 years (Table 1).

The crude incidence of DKA was 112.5 per 1,000 patient-years in people with eating disorders vs. 30.8 per 1,000 person-years in people without eating disorders (Fig. 1). After adjustment for

**Table 1—Baseline characteristics of adolescents and young adults with type 1 diabetes with and without eating disorders, matched on age and sex**

|                          | With eating disorder | Without eating disorder | Standardized difference |
|--------------------------|----------------------|-------------------------|-------------------------|
| N                        | 168                  | 1,680                   |                         |
| Age, years               | 27.1 ± 6.8           | 27.1 ± 6.8              | 0                       |
| Sex                      |                      |                         |                         |
| Female                   | 156 (92.9)           | 1,560 (92.9)            | 0                       |
| Male                     | 12 (7.1)             | 120 (7.1)               | 0                       |
| Income quintile          |                      |                         |                         |
| Lowest                   | 44 (26.2)            | 385 (22.9)              | 7.6                     |
| 2nd                      | 29 (17.3)            | 337 (20.1)              | 7.2                     |
| 3rd                      | 34 (20.2)            | 333 (19.8)              | 1.0                     |
| 4th                      | 29 (17.3)            | 327 (19.5)              | 5.7                     |
| Highest                  | 32 (19.0)            | 298 (17.7)              | 3.4                     |
| Rurality                 |                      |                         |                         |
| Urban                    | 120 (71.4)           | 1,130 (67.3)            | 9.0                     |
| Semiurban                | 36 (21.4)            | 370 (22.0)              | 1.4                     |
| Rural                    | 12 (7.1)             | 180 (10.7)              | 12.5                    |
| Diabetes duration, years |                      |                         |                         |
| <5                       | 21 (12.5)            | 191 (11.4)              | 3.5                     |
| 5 to <10                 | 23 (13.7)            | 352 (21.0)              | 19.3                    |
| 10 to <15                | 42 (25.0)            | 384 (22.9)              | 5.0                     |
| ≥15                      | 82 (48.8)            | 753 (44.8)              | 8.0                     |

Data are n (%) or means ± SD unless otherwise indicated.

baseline differences, the subdistribution hazard ratio for comparison of people with and without eating disorders was 3.30 (95% CI 2.58–4.23;  $P < 0.0001$ ). Female patients with eating disorders had a slightly higher risk for DKA compared with male patients (Table 2). All-cause mortality was 16.0 per 1,000 person-years in people with eating disorders vs. 2.5 per 1,000 person-years in

people without eating disorders (Fig. 2). The adjusted hazard ratio was 5.80 (95% CI 3.04–11.08;  $P < 0.0001$ ). Males with eating disorders had an increased risk for mortality compared with females (Table 2). In comparison, among adolescents and young adults without type 1 diabetes, the prevalence of eating disorders was 0.2%. All-cause mortality was 2.5 per 1,000 person-years in those with

eating disorders vs. 0.4 per 1,000 person-years in those without, with adjusted hazard ratio 5.83 (95% CI 4.71–7.22;  $P < 0.0001$ ).

Neither income nor rurality was an effect modifier of the relationship between eating disorder and DKA.

We also conducted a sensitivity analysis that restricted the look-back period for eating disorder diagnosis to 5 years. In this analysis, there were 73 people with eating disorders matched to 730 without. The incidence of DKA was, respectively, 117.3 per 1,000 person-years and 37.5 per 1,000 person-years, and the adjusted subdistribution hazard ratio was 4.37 (95% CI 4.23–4.51;  $P < 0.0001$ ). All-cause mortality was 22.0 per 1,000 person-years in people with eating disorders vs. 2.8 per 1,000 person-years in people without, and the adjusted hazard ratio was 8.42 (95% CI 3.43–20.65;  $P < 0.0001$ ).

## CONCLUSIONS

Adolescents and young adults with type 1 diabetes had nearly five times the prevalence of eating disorders as adolescents and young adults without type 1 diabetes. Those with eating disorders have more than triple the risk of DKA hospitalizations compared with their peers without eating disorders. Strikingly, the all-cause mortality for young people with type 1 diabetes and eating disorders was 1.6% per year. Compared with those without eating disorders, female patients with eating disorders had a nearly 5.0-fold increased risk of death and male patients had >14-fold increased risk. Although the absolute mortality risk was much higher for people with type 1 diabetes compared with those without, the relative impact of eating disorders was essentially similar.

Many previous studies have shown that young people with type 1 diabetes are at increased risk of developing eating disorders compared with their peers without diabetes (2–4). However, few previous studies have examined the impact of eating disorders on the most serious adverse outcomes of type 1 diabetes, DKA, and mortality. A cohort of 91 young women with type 1 diabetes found that those with eating disorders had an increased risk of diabetic retinopathy after 4 years (12). Similarly, a small British cohort found a strong

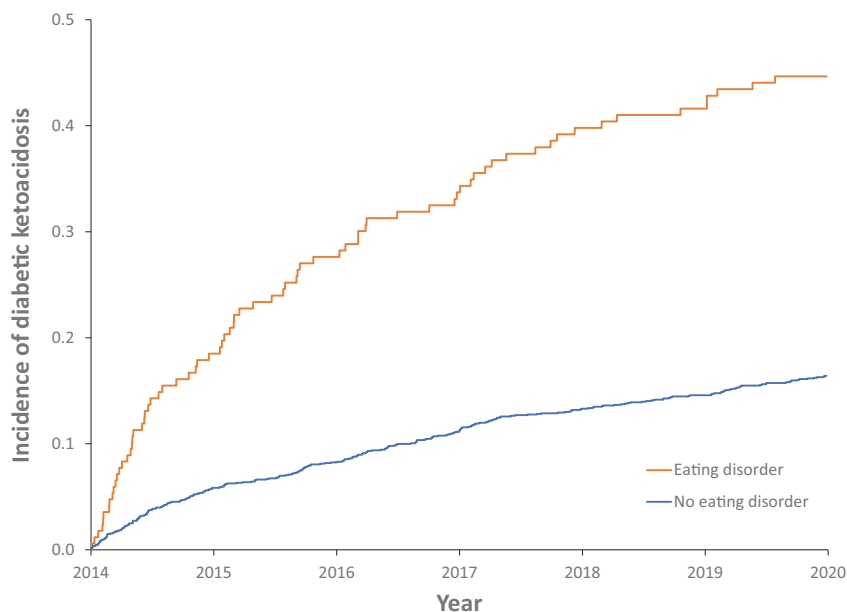

**Figure 1—Cumulative incidence of DKA in adolescents and young adults with type 1 diabetes with and without an eating disorder.**

**Table 2—Hazard ratios for DKA and mortality for comparisons of adolescents and young adults with type 1 diabetes and eating disorders with those without eating disorders**

|                      | Overall               |         | Females               |         | Males                 |      |
|----------------------|-----------------------|---------|-----------------------|---------|-----------------------|------|
|                      | Hazard ratio (95% CI) | P       | Hazard ratio (95% CI) | P       | Hazard ratio (95% CI) | P    |
| DKA*                 | 3.30 (2.58–4.23)      | <0.0001 | 3.41 (2.63–4.42)      | <0.0001 | 2.47 (0.70–8.72)      | 0.16 |
| All-cause mortality† | 5.80 (3.04–11.08)     | <0.0001 | 5.38 (2.70–10.71)     | <0.0001 | 14.17 (1.26–159.06)   | 0.03 |

\*Adjustment for income, rurality, and diabetes duration. †Adjustment for diabetes duration.

association between eating disorders and the development of microvascular complications (26). Severe hypoglycemia episodes have also been shown to be increased among people with eating disorders (14). Two large studies of European cohorts found that those with eating disorders had more than double the risk of DKA (13,14). A relatively large survey of Americans with type 1 diabetes found a similar result (27). Our study corroborates this finding, though the risk for DKA observed in our population was higher. Only one previous study has examined mortality in patients with type 1 diabetes and an eating disorder, which summarized data from various published registries in the 1970s and 1980s and found that standardized mortality ratio for women with type 1 diabetes and an eating disorder was 3.5 times that of women with type 1 diabetes without an eating disorder (19). Another small cohort of women with type 1 diabetes who restrict insulin had

a threefold mortality rate compared with those who do not (28).

The strengths of this study include the use of large population-based health care administrative data, which allows sufficient power to study rare complications of relatively uncommon disorders. Ascertainment of diabetes status through a provincial population-based registry provides a more representative sample than most work to date, which has usually focused on individuals identified in specialized care settings. Because of the single-payer universal health care system in Ontario, these data include all residents of the province, with no loss to follow-up or missing data. There are several limitations to this study, however. We identified people with eating disorders based on a prior history of a hospital admission or emergency department visit coded for an eating disorder. This definition may have missed milder cases of an eating disorder, and the prevalence of eating disorders that we identified among people with type 1 diabetes is

lower than what has previously been reported (3,4). Thus, the results of the study may not be generalizable to people with less severe eating disorders who have not required hospitalization or emergency department care. The eating disturbances identified in previous studies of type 1 diabetes tended to include a small number of individuals with anorexia nervosa and bulimia nervosa and a majority of individuals with other behavioral disturbances that may appear less severe but still conferred an elevated risk for metabolic complications due to high rates of insulin misuse and resulting compromised metabolic control. Additionally, we did not have access to clinical data such as glycemic control, weight, or BMI. However, these factors are likely part of the causal pathway linking eating disorders to both DKA and mortality, so their inclusion in the regression models would have been inappropriate. For the same reason, we chose not to measure or adjust for differences in comorbidities and complications. Finally, we were unable to explore the behavioral, psychological, and biological factors that may have contributed to the observed associations, as we were using population-level administrative data. Nevertheless, this study highlights the grave medical risks faced by individuals with eating disorders and diabetes presenting to acute care settings.

In summary, our study shows that adolescents and young adults with type 1 diabetes and concurrent eating disorders represent a high-risk group for both DKA and premature death as compared with peers without eating disorders. It is important to incorporate screening tools for disordered eating behavior into routine type 1 diabetes care to allow for timely identification of such patients and to consider eating disorders as a reason for poor glycemic control, potentially due to insulin withholding. In addition, regular screening for eating disorder symptoms in young individuals with type

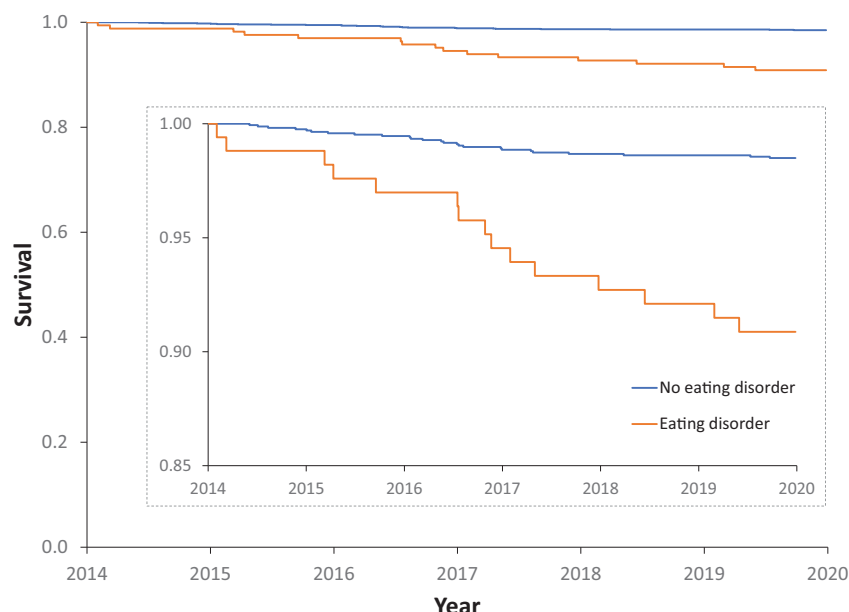

**Figure 2—Survival of adolescents and young adults with type 1 diabetes with and without an eating disorder.**

1 diabetes, early referral for mental health evaluation, and the development and evaluation of interventions to prevent these outcomes for these high-risk patients are all warranted, as a recent systematic review found that no interventions have been shown to be effective in this complex patient group (29). Health care providers involved in the dissemination of dietary and exercise education to adolescents and young adults with type 1 diabetes should carefully consider the impact these recommendations may have on eating behaviors.

**Funding.** This study was supported by ICES, which is funded by an annual grant from the Ontario Ministry of Health and the Ministry of Long-Term Care. Parts of this material are based on data and information compiled and provided by the Canadian Institute for Health Information.

The analyses, conclusions, opinions, and statements expressed in this study are solely those of the authors and do not reflect those of the funding or data sources; endorsement is neither intended nor inferred.

**Duality of Interest.** No potential conflicts of interest relevant to this article were reported.

**Author Contributions.** N.K.G. and B.R.S. contributed to the design of the study. B.R.S. contributed to the analysis of data. All authors contributed to the interpretation of data. N.K.G. drafted the manuscript. All authors reviewed and edited the manuscript and approved the final version for publication. B.R.S. is the guarantor of this work and, as such, had full access to all of the data in the study and takes responsibility for the integrity of the data and the accuracy of the data analysis.

## References

1. American Psychiatric Association. *Diagnostic and Statistical Manual of Mental Disorders*. 5th ed. Arlington, VA, American Psychiatric Association, 2013
2. Jones JM, Lawson ML, Daneman D, Olmsted MP, Rodin G. Eating disorders in adolescent females with and without type 1 diabetes: cross sectional study. *BMJ* 2000;320:1563–1566
3. Young V, Eiser C, Johnson B, et al. Eating problems in adolescents with type 1 diabetes: a systematic review with meta-analysis. *Diabet Med* 2013;30:189–198
4. Mannucci E, Rotella F, Ricca V, Moretti S, Placidi GF, Rotella CM. Eating disorders in patients with type 1 diabetes: a meta-analysis. *J Endocrinol Invest* 2005;28:417–419
5. Toni G, Berioli MG, Cerquiglini L, et al. Eating disorders and disordered eating symptoms in adolescents with type 1 diabetes. *Nutrients* 2017;9:906
6. Polonsky WH, Anderson BJ, Lohrer PA, Aponte JE, Jacobson AM, Cole CF. Insulin omission in women with IDDM. *Diabetes Care* 1994;17:1178–1185
7. Takii M, Uchigata Y, Kishimoto J, et al. The relationship between the age of onset of type 1 diabetes and the subsequent development of a severe eating disorder by female patients. *Pediatr Diabetes* 2011;12:396–401
8. Neumark-Sztainer D, Patterson J, Mellin A, et al. Weight control practices and disordered eating behaviors among adolescent females and males with type 1 diabetes: associations with sociodemographics, weight concerns, familial factors, and metabolic outcomes. *Diabetes Care* 2002;25:1289–1296
9. Wisting L, Bang L, Skriverhaug T, Dahl-Jørgensen K, Rø Ø. Adolescents with type 1 diabetes—the impact of gender, age, and health-related functioning on eating disorder psychopathology. *PLoS One* 2015;10:e0141386
10. Colton PA, Olmsted MP, Daneman D, Rydall AC, Rodin GM. Five-year prevalence and persistence of disturbed eating behavior and eating disorders in girls with type 1 diabetes. *Diabetes Care* 2007;30:2861–2862
11. Olmsted MP, Colton PA, Daneman D, Rydall AC, Rodin GM. Prediction of the onset of disturbed eating behavior in adolescent girls with type 1 diabetes. *Diabetes Care* 2008;31:1978–1982
12. Rydall AC, Rodin GM, Olmsted MP, Devenyi RG, Daneman D. Disordered eating behavior and microvascular complications in young women with insulin-dependent diabetes mellitus. *N Engl J Med* 1997;336:1849–1854
13. Scheuing N, Bartus B, Berger G, et al.; DPV Initiative; German BMBF Competence Network Diabetes Mellitus. Clinical characteristics and outcome of 467 patients with a clinically recognized eating disorder identified among 52,215 patients with type 1 diabetes: a multicenter German/Austrian study. *Diabetes Care* 2014;37:1581–1589
14. Reinehr T, Dieris B, Galler A, et al. Worse metabolic control and dynamics of weight status in adolescent girls point to eating disorders in the first years after manifestation of type 1 diabetes mellitus: findings from the Diabetes Patienten Verlaufsdokumentation Registry. *J Pediatr* 2019;207:205–212.e5
15. Takii M, Uchigata Y, Tokunaga S, et al. The duration of severe insulin omission is the factor most closely associated with the microvascular complications of type 1 diabetic females with clinical eating disorders. *Int J Eat Disord* 2008;41:259–264
16. Steel JM, Young RJ, Lloyd GG, Clarke BF. Clinically apparent eating disorders in young diabetic women: associations with painful neuropathy and other complications. *Br Med J (Clin Res Ed)* 1987;294:859–862
17. Bächle C, Stahl-Peche A, Rosenbauer J. Disordered eating and insulin restriction in youths receiving intensified insulin treatment: results from a nationwide population-based study. *Int J Eat Disord* 2016;49:191–196
18. Colton PA, Olmsted MP, Wong H, Rodin GM. Eating disorders in individuals with type 1 diabetes: case series and day hospital treatment outcome. *Eur Eat Disord Rev* 2015;23:312–317
19. Nielsen S, Emborg C, Mølbak A-G. Mortality in concurrent type 1 diabetes and anorexia nervosa. *Diabetes Care* 2002;25:309–312
20. Lipscombe LL, Hwee J, Webster L, Shah BR, Booth GL, Tu K. Identifying diabetes cases from administrative data: a population-based validation study. *BMC Health Serv Res* 2018;18:316
21. Guttmann A, Nakhla M, Henderson M, et al. Validation of a health administrative data algorithm for assessing the epidemiology of diabetes in Canadian children. *Pediatr Diabetes* 2010;11:122–128
22. Weisman A, Tu K, Young J, et al. Validation of a type 1 diabetes algorithm using electronic medical records and administrative healthcare data to study the population incidence and prevalence of type 1 diabetes in Ontario, Canada. *BMJ Open Diabetes Res Care* 2020;8:e001224
23. Kurdyak P, de Oliveira C, Iwajomo T, Bondy S, Trotter K, Colton P. Identifying individuals with eating disorders using health administrative data. *Can J Psychiatry* 2020;65:107–114
24. Austin PC. Using the standardized difference to compare the prevalence of a binary variable between two groups in observational research. *Commun Stat Simul Comput* 2009;38:1228–1234
25. Mamdani M, Sykora K, Li P, et al. Reader's guide to critical appraisal of cohort studies: 2. Assessing potential for confounding. *BMJ* 2005;330:960–962
26. Peveler RC, Bryden KS, Neil HAW, et al. The relationship of disordered eating habits and attitudes to clinical outcomes in young adult females with type 1 diabetes. *Diabetes Care* 2005;28:84–88
27. Nip ASY, Reboussin BA, Dabelea D, et al.; SEARCH for Diabetes in Youth Study Group. Disordered eating behaviors in youth and young adults with type 1 or type 2 diabetes receiving insulin therapy: the SEARCH for Diabetes in Youth Study. *Diabetes Care* 2019;42:859–866
28. Goebel-Fabbri AE, Fikkan J, Franko DL, Pearson K, Anderson BJ, Weinger K. Insulin restriction and associated morbidity and mortality in women with type 1 diabetes. *Diabetes Care* 2008;31:415–419
29. Clery P, Stahl D, Ismail K, Treasure J, Kan C. Systematic review and meta-analysis of the efficacy of interventions for people with type 1 diabetes mellitus and disordered eating. *Diabet Med* 2017;34:1667–1675
